# Supplementary material for: Lanthanide based white-light-emitting hydrogel mediated by fluorescein and carbon dots with high quantum yield and multi-stimuli responsiveness
Source: Royal Society of Chemistry journal article supplement (doi:10.1039/c9tc06590c), 2020-01-01
Supplement: c9tc06590c1.pdf [file c9tc06590c1.pdf]

## Supporting Information

### **Lanthanide Based White-Light-Emitting Hydrogel Mediated by Fluorescein and Carbon Dots with High Quantum Yield and Multi-stimuli Responsiveness**

Juan Xue<sup>†a</sup>, Xihan Xu<sup>†a</sup>, Yi Zhu<sup>a</sup> and Dayong Yang<sup>\*a</sup>

Frontier Science Center for Synthetic Biology, Key Laboratory of Systems Bioengineering (MOE), School of Chemical Engineering and Technology, Tianjin University, Tianjin, 300350, P. R. China.

\* Corresponding author: [dayong.yang@tju.edu.cn](mailto:dayong.yang@tju.edu.cn)

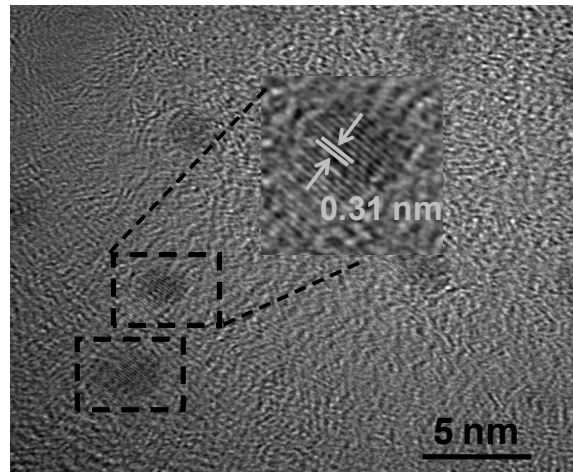

**Figure S1.** TEM and HRTEM (inserted) images of CDs.

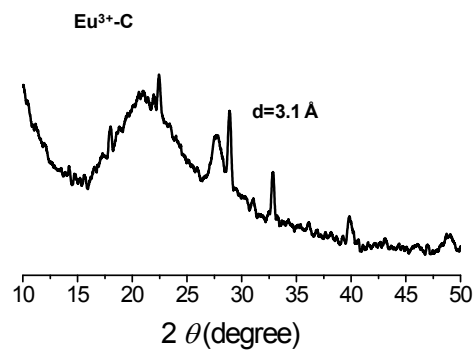

**Figure S2.** PXRD pattern of Eu<sup>3+</sup>-C complex.

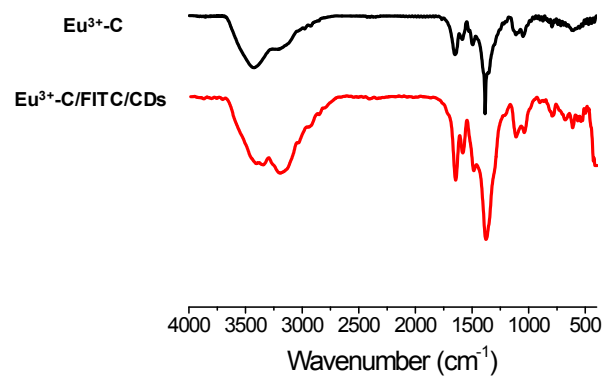

**Figure S3.** FTIR spectra of Eu<sup>3+</sup>-C complex and Eu<sup>3+</sup>-C/FITC/CDs hydrogel.

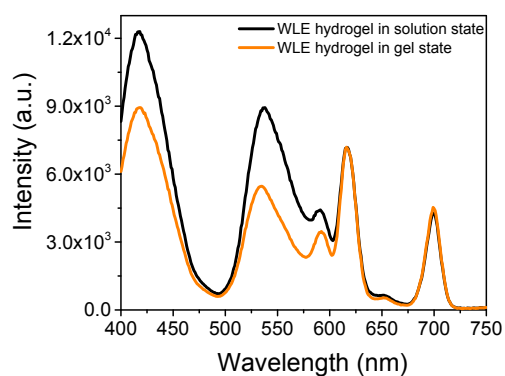

**Figure S4.** Fluorescence emission spectra of WLE hydrogel in solution and gel states.

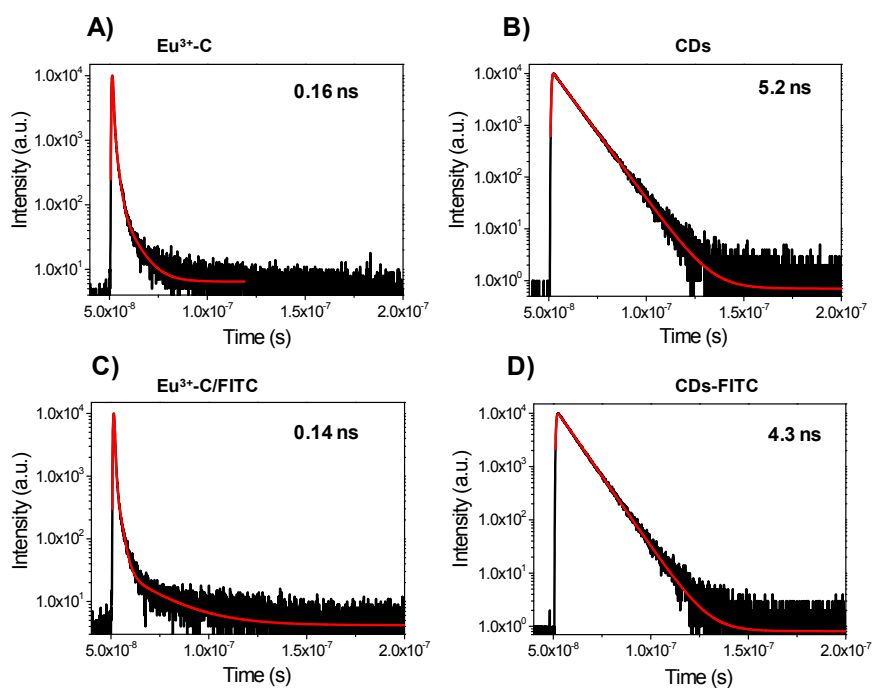

**Figure S5.** Fluorescent decay curves of Eu<sup>3+</sup>-C and CDs in the absence (A, B) and presence (C, D) of FITC at emission wavelength 417 nm.

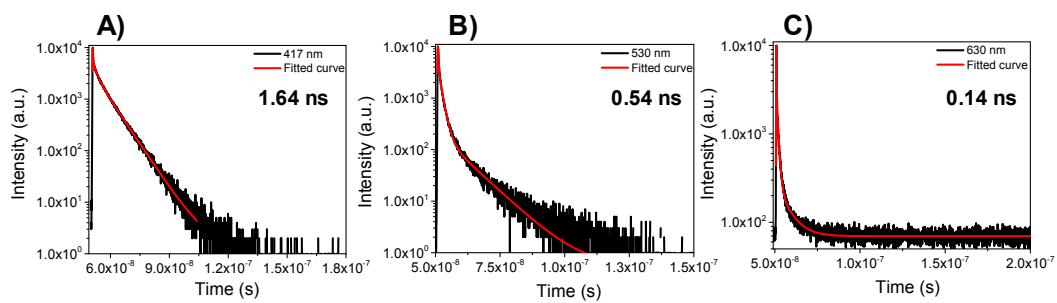

**Figure S6.** Fluorescent decay and fitted curves of WLE hydrogel at emission wavelength 417 nm (a), 530 nm (b) and 630 nm (c).

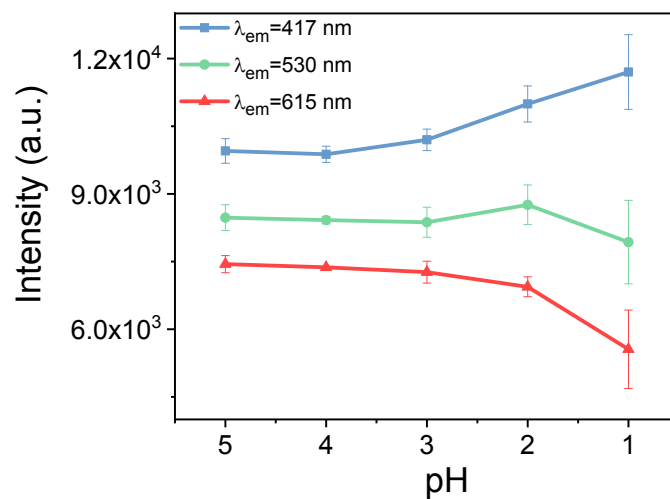

**Figure S7.** Concentration dependence behaviors of WLE hydrogel upon pH.

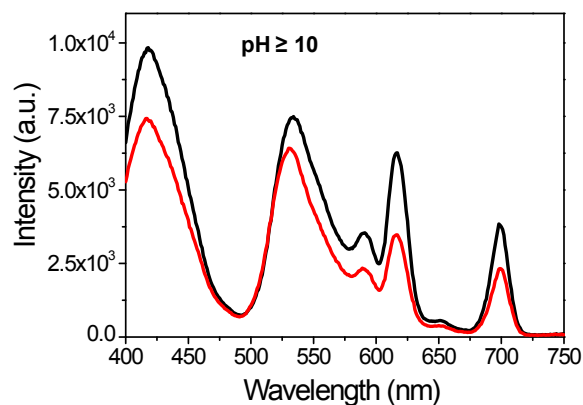

**Figure S8.** Fluorescent emission spectra of WLE hydrogel under neutral (pH = 7) and alkaline (pH  $\geq$  10) conditions.

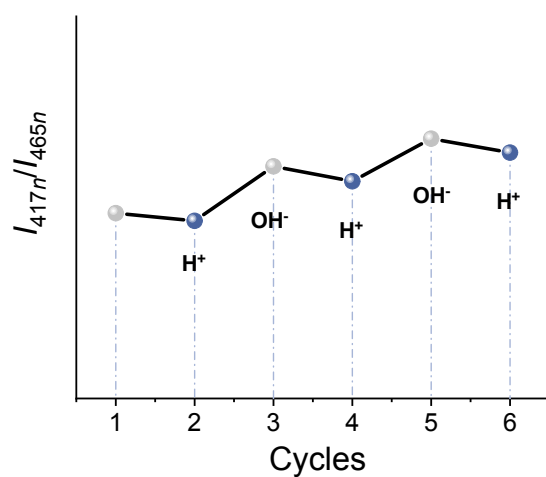

**Figure S9.** The cyclic responsiveness of WLE hydrogel upon pH. The change of  $I_{417n}/I_{465n}$  within three consecutive cycles of WLE hydrogel in the presence of  $H^+$  (pH=1).  $n$  represents the number of measurements.

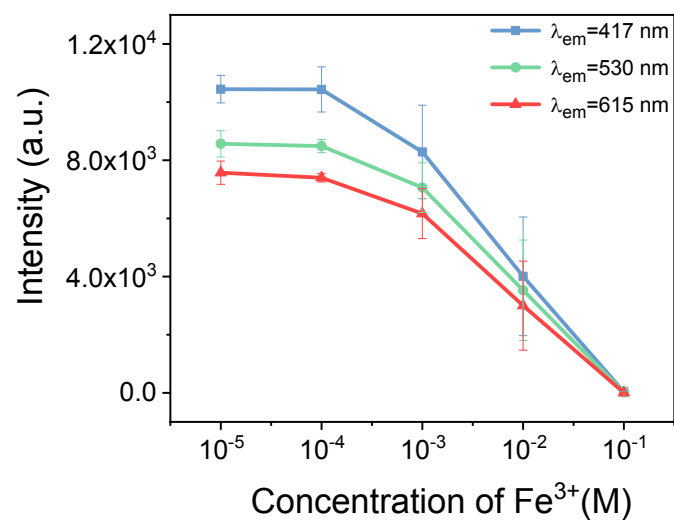

**Figure S10.** Concentration dependence behaviors of WLE hydrogel upon Fe<sup>3+</sup>.

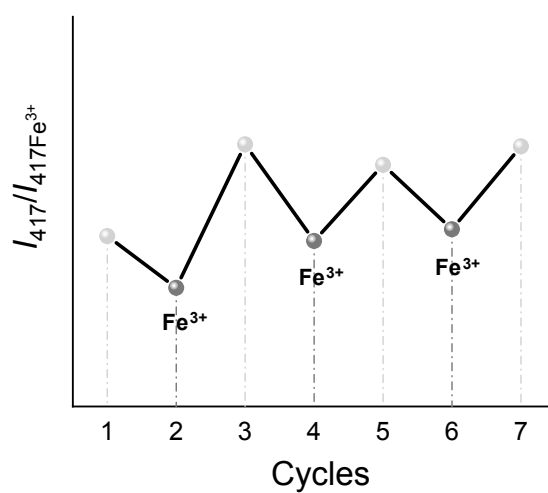

**Figure S11.** The cyclic responsiveness of WLE hydrogel upon Fe<sup>3+</sup>. The change of  $I_{417}/I_{417Fe^{3+}}$  within three consecutive cycles of WLE hydrogel in the presence of Fe<sup>3+</sup> (10 mM).

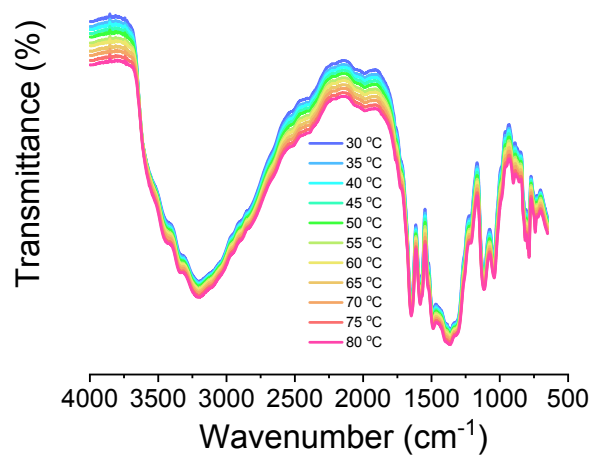

**Figure S12.** Temperature-varying FTIR of WLE hydrogel with temperature range from 30 to 80°C.

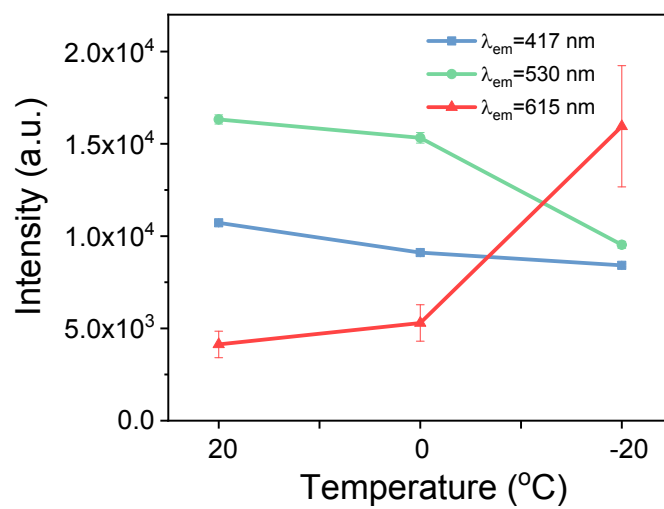

**Figure S13.** Temperature dependence behaviors of WLE hydrogel.

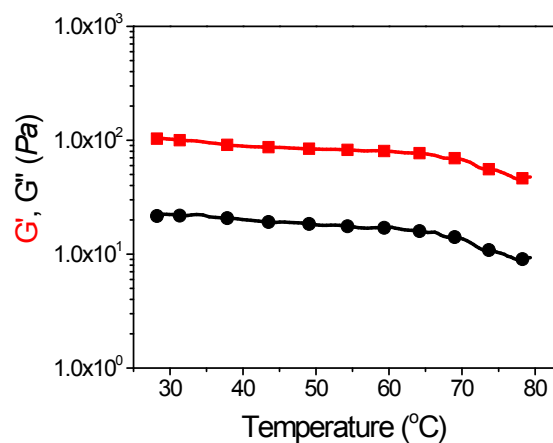

**Figure S14.** Storage modulus  $G'$  (red solid squares) and loss modulus  $G''$  (black solid circles) versus temperature of WLE hydrogel

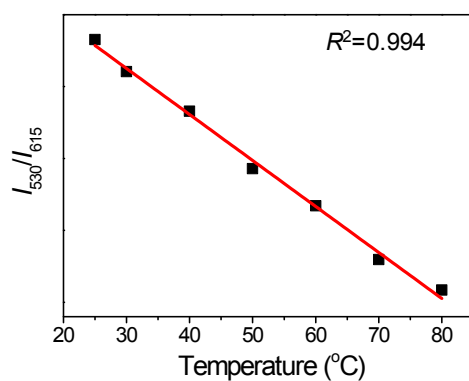

**Figure S15.** Relationship between the temperature and the intensity of green-to-red emission ratio ( $I_{530}/I_{615}$ ).
